# Supplementary material
Source: Springer Nature journal article supplement (https://www.springermedizin.de/resource/supplementary/12889_2013_6736_MOESM1_ESM.pdf/9498860)

## Health System Perspective

- How to integrate these perspectives at a policy level to inform integrated management
- Incorporating disease interaction complexity, patient and provider priorities into patient engagement with the health system

MACRO

## Biological Interaction

Effect of chronic disease morbidities on:

- Susceptibility and risk of HIV/TB (incl. role of shared risk factors)
- Diagnosis and clinical manifestation of TB
- Diagnosis and clinical manifestation of NCD
- Complications and treatment outcomes of HIV/TB/NCD

Policy environment

MESO

## Healthcare Provider Perspective

- Health provider capacity to deal with high patient load and complexity
- Health provider role delineation

Community Partners

Health Care team

Patients and Families

MICRO

## Patient Perspective

Effect of multiple chronic disease morbidities on:

- Patient workload (incl. impact of poverty)
- Treatment load
- Resilience and capacity
- Patient prioritization of morbidities

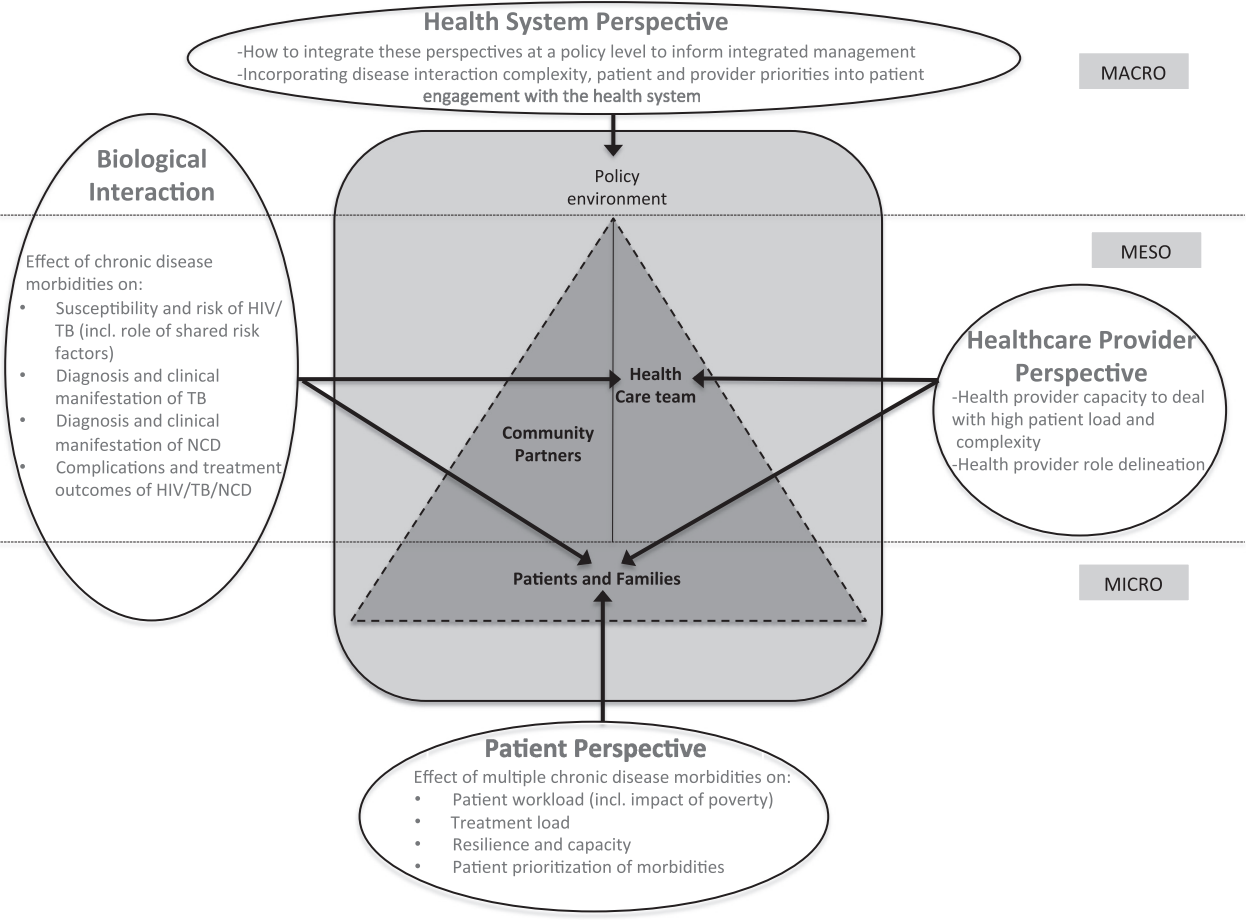

Supplement: MOESM1 [file 9498860]
